# Supplementary material for: Efficient removal of Pb2+ and Cd2+ using a Cu(i)–Br coordination polymer constructed with an amino-rich ligand
Source: Royal Society of Chemistry journal article supplement (doi:10.1039/d0ce01785j), 2020-12-29
Supplement: d0ce01785j1.pdf [file d0ce01785j1.pdf]

## Supporting information

### Efficient removal of $\text{Pb}^{2+}$ and $\text{Cd}^{2+}$ using Cu(I)-Br coordination polymer constructed with amino-rich sites ligand

Qin Hou<sup>\*,a</sup>, Qingfeng Yang<sup>b</sup>, Chengxia Miao<sup>a</sup>, Junling Duan<sup>a</sup>, Yuanhong Zhang<sup>a</sup>, Shiyun Ai<sup>\*,a</sup>

\*Corresponding authors.

*E-Mail address:* [houqin@sdau.edu.cn](mailto:houqin@sdau.edu.cn) (Q. Hou), [ashy@sdau.edu.cn](mailto:ashy@sdau.edu.cn) (S. Y. Ai)

<sup>a</sup> College of Chemistry and Material Science, Shandong Agricultural University, Taian, Shandong 271018, PR China

<sup>b</sup> State Key Laboratory of High-efficiency Utilization of Coal and Green Chemical Engineering, Ningxia University, Yinchuan 750021, PR China

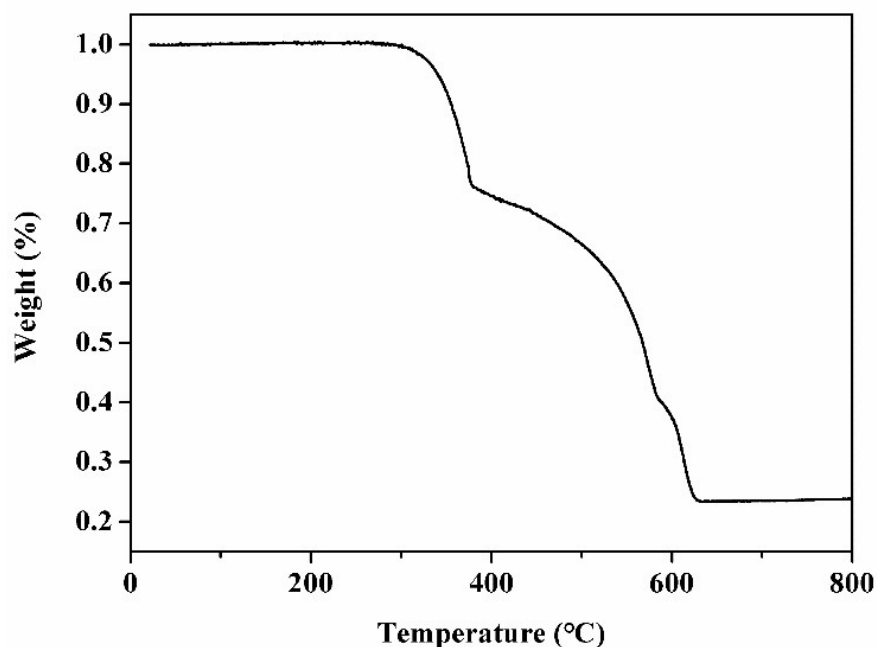

Fig. S1 The TGA curve for compound 1.

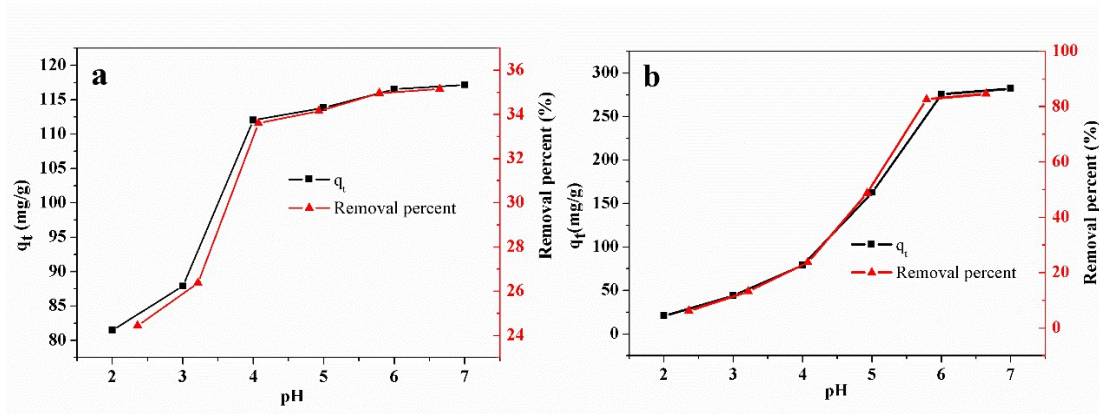

Fig. S2 Effect of the pH on the adsorption of Pb<sup>2+</sup> (a) and Cd<sup>2+</sup> (b) on compound 1.

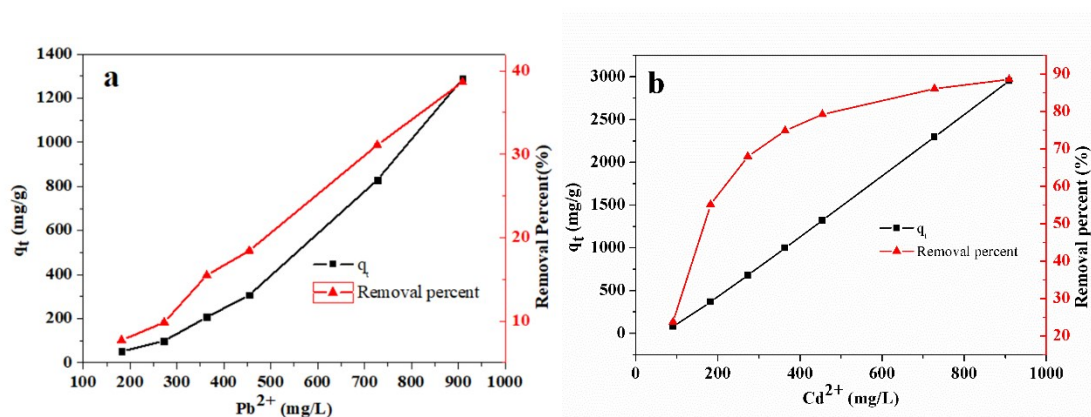

Fig. S3 Effect of initial concentration of Pb<sup>2+</sup> (a) and Cd<sup>2+</sup> (b) on the adsorption capacity and removal rate of 1.

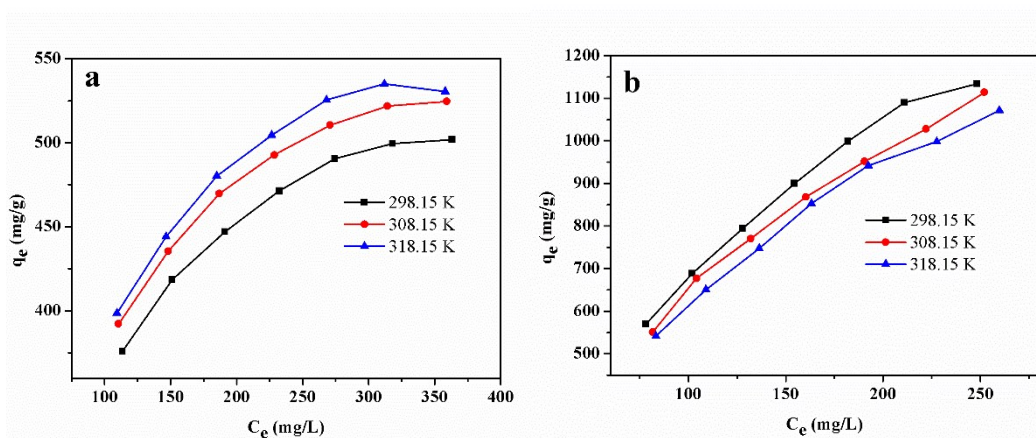

Fig. S4 Adsorption isotherms for Pb<sup>2+</sup> (a) and Cd<sup>2+</sup> (b) on compound 1.

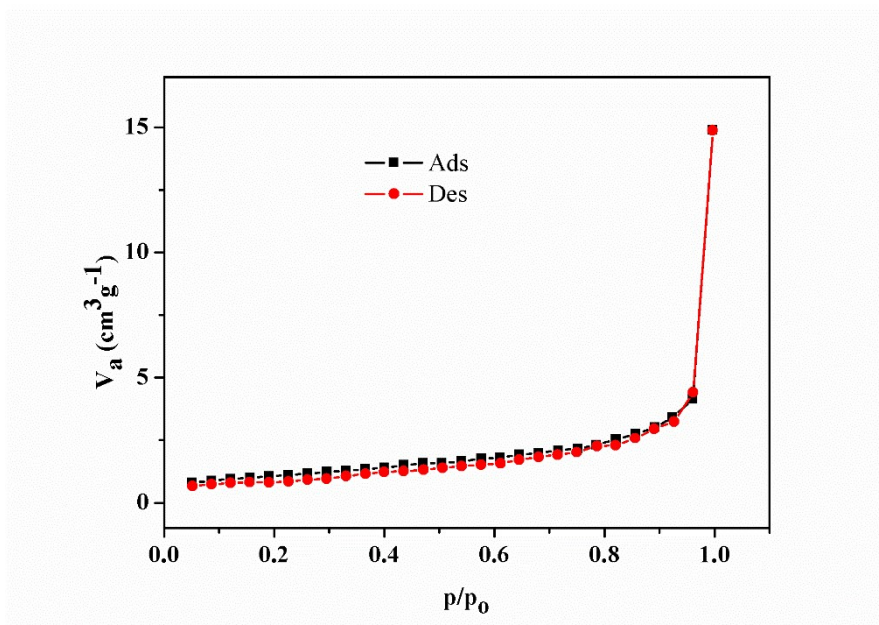

Fig. S5 Adsorption isotherm of N<sub>2</sub> for compound **1**.

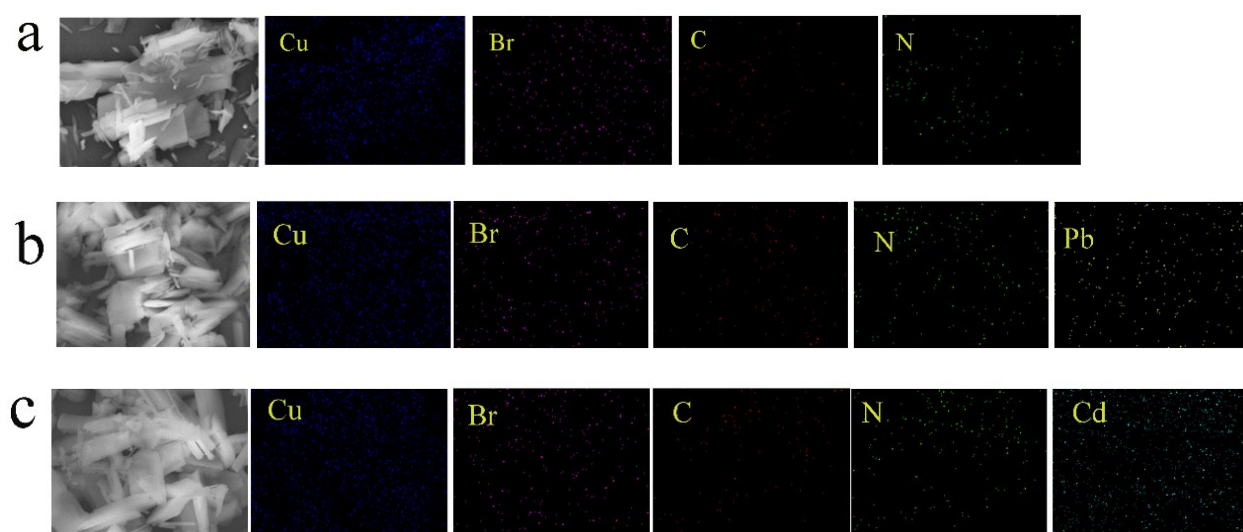

Fig. S6 Elemental SEM mapping images of compound **1**(a); after adsorption of Pb<sup>2+</sup> and Cd<sup>2+</sup> (b and c).

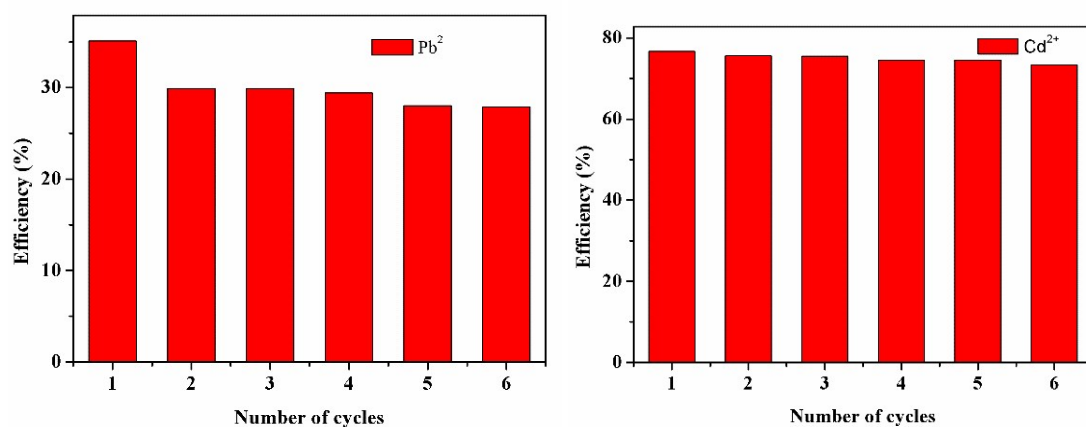

Fig. S7 Reusability of the compound **1** for Pb<sup>2+</sup> and Cd<sup>2+</sup> adsorption.

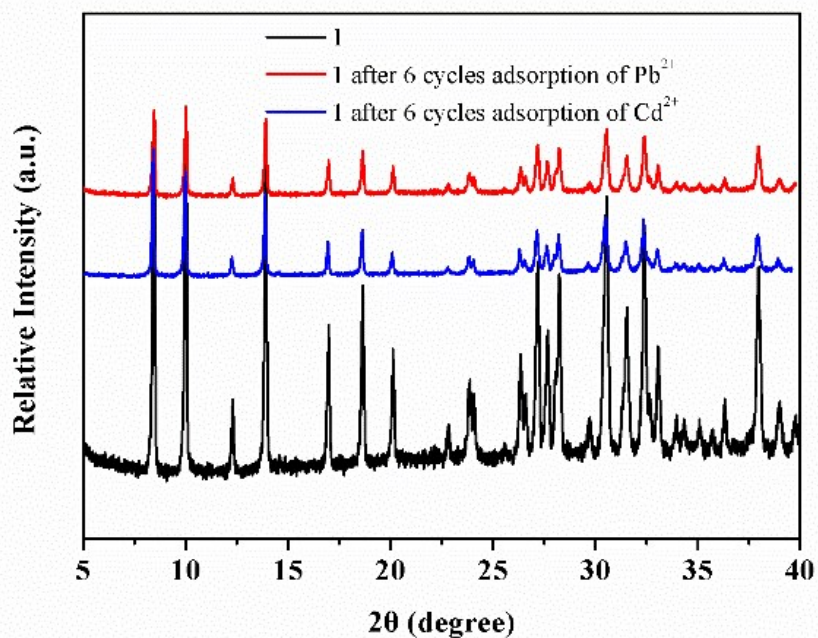

Fig. S8 Powder X-ray diffraction patterns for compound **1** and **1** after 6 adsorption cycles of Pb<sup>2+</sup> and Cd<sup>2+</sup>.

Table S1. The detail single crystal data parameters of compound **1**.

|                                                                                                                                                   |                                                                                             |
|---------------------------------------------------------------------------------------------------------------------------------------------------|---------------------------------------------------------------------------------------------|
| Empirical formula                                                                                                                                 | C <sub>6</sub> H <sub>12</sub> N <sub>12</sub> Br <sub>2</sub> Cu <sub>2</sub> ( <b>1</b> ) |
| Formula weight                                                                                                                                    | 539.18                                                                                      |
| <i>T</i> (K)                                                                                                                                      | 296.15                                                                                      |
| Crystal system                                                                                                                                    | <i>P</i> -1                                                                                 |
| Space group                                                                                                                                       | triclinic                                                                                   |
| <i>a</i> /Å                                                                                                                                       | 3.849(6)                                                                                    |
| <i>b</i> /Å                                                                                                                                       | 9.074(15)                                                                                   |
| <i>c</i> /Å                                                                                                                                       | 10.642(17)                                                                                  |
| <i>V</i> /Å <sup>3</sup>                                                                                                                          | 354.9(10)                                                                                   |
| <i>Z</i>                                                                                                                                          | 2                                                                                           |
| <i>D</i> <sub>c</sub> /Mg mm <sup>-3</sup>                                                                                                        | 2.523                                                                                       |
| $\mu$ /mm <sup>-1</sup>                                                                                                                           | 8.643                                                                                       |
| <i>F</i> (000)                                                                                                                                    | 260                                                                                         |
| Radiation                                                                                                                                         | MoK $\alpha$ ( $\lambda$ = 0.71073)                                                         |
| Reflections collected                                                                                                                             | 1723                                                                                        |
| Independent reflections                                                                                                                           | 1235 [ <i>R</i> <sub>int</sub> = 0.0504, <i>R</i> <sub>sigma</sub> = 0.1048]                |
| Data/restraints/parameters                                                                                                                        | 1235/0/102                                                                                  |
| Goodness-of-fit on <i>F</i> <sup>2</sup>                                                                                                          | 0.985                                                                                       |
| Final <i>R</i> indexes [ <i>I</i> ≥ 2σ ( <i>I</i> )]                                                                                              | <i>R</i> <sub>1</sub> <sup>a</sup> = 0.0686, <i>wR</i> <sub>2</sub> <sup>b</sup> = 0.1737   |
| Final <i>R</i> indexes [all data]                                                                                                                 | <i>R</i> <sub>1</sub> = 0.0985, <i>wR</i> <sub>2</sub> = 0.1887                             |
| <sup>a</sup> $R_1 = \frac{\sum   F_o  -  F_c  }{\sum  F_o }$ .<br><sup>b</sup> $wR^2 = \frac{ \sum w( F_o ^2 -  F_c ^2) }{\sum w(F_o^2)^2}^{1/2}$ |                                                                                             |

Table S2 The kinetic parameters of pseudo-first-order and pseudo-second-order kinetic models for Pb<sup>2+</sup> and Cd<sup>2+</sup> on compound **1**.

|                  | Initial concentration (mg/L) | Pseudo-first order model |               |         | Pseudo-second order model |                    |         |
|------------------|------------------------------|--------------------------|---------------|---------|---------------------------|--------------------|---------|
|                  |                              | $q_e$ (mg/g)             | $k_1$ (1/min) | $R^2$   | $q_e$ (mg/g)              | $k_2$ (g/mg · min) | $R^2$   |
| Pb <sup>2+</sup> | 300                          | 361                      | 0.1085        | 0.99747 | 394                       | 0.0004327          | 0.99619 |
|                  | 500                          | 878                      | 0.2173        | 0.98836 | 787                       | 0.001047           | 0.99932 |
|                  | 800                          | 1519                     | 0.2649        | 0.99346 | 1667                      | 0.0008438          | 0.99993 |
|                  | 1000                         | 2063                     | 0.2009        | 0.9862  | 2274                      | 0.0002969          | 0.99989 |
| Cd <sup>2+</sup> | 300                          | 1023                     | 0.1925        | 0.98833 | 1067                      | 0.001028           | 0.9998  |
|                  | 500                          | 1735                     | 0.234         | 0.97872 | 1993                      | 0.0008426          | 0.99993 |
|                  | 800                          | 2830                     | 0.3519        | 0.98136 | 3450                      | 0.001612           | 0.99998 |
|                  | 1000                         | 3170                     | 0.3045        | 0.9365  | 4436                      | 0.001055           | 0.99998 |

Table S3 The Langmuir and Freundlich isotherm parameters of Pb<sup>2+</sup> and Cd<sup>2+</sup> on compound **1** under different temperatures.

| Metal ions       | T (K)  | Langmuir constants |              |        | Freundlich constants |        |        |
|------------------|--------|--------------------|--------------|--------|----------------------|--------|--------|
|                  |        | $q_m$ (mg/g)       | $K_L$ (L/mg) | $R^2$  | $K_F$ (L/g)          | $1/n$  | $R^2$  |
| Pb <sup>2+</sup> | 298.15 | 598.8              | 0.01551      | 0.9986 | 116.8                | 0.2525 | 0.9542 |
|                  | 308.15 | 621                | 0.01609      | 0.9988 | 124.1                | 0.2502 | 0.9529 |
|                  | 318.15 | 633                | 0.01663      | 0.9987 | 126.6                | 0.2507 | 0.9292 |
| Cd <sup>2+</sup> | 298.15 | 2175               | 0.004559     | 0.9900 | 40.13                | 0.6137 | 0.9892 |
|                  | 308.15 | 2078               | 0.004486     | 0.9943 | 39.82                | 0.6042 | 0.9921 |
|                  | 318.15 | 2007               | 0.004432     | 0.9939 | 38.20                | 0.6041 | 0.9908 |

Table S4 Comparison of the adsorption capacity of Pb<sup>2+</sup> and Cd<sup>2+</sup> by various adsorbents.

| Adsorbent                                          | Metal ion        | Adsorption capacity (mg/g) | Reference |
|----------------------------------------------------|------------------|----------------------------|-----------|
| nFe <sub>3</sub> O <sub>4</sub> @MIL-88A(Fe)/APTMS | Pb <sup>2+</sup> | 536.22                     | 22        |
|                                                    | Cd <sup>2+</sup> | 693                        | 22        |
| Fe <sub>3</sub> O <sub>4</sub> -HBPA-ASA           | Pb <sup>2+</sup> | 88.36                      | 23        |
|                                                    | Cd <sup>2+</sup> | 165.46                     | 23        |
| melamine modified Zr-MOFs                          | Pb <sup>2+</sup> | 205                        | 27        |
| Urea-based MOFs                                    | Pb <sup>2+</sup> | 909                        | 37        |
| UiO-66-NH <sub>2</sub> MOF                         | Pb <sup>2+</sup> | 441.2                      | 17        |
|                                                    | Cd <sup>2+</sup> | 415.6                      | 17        |
| Cu <sub>2</sub> Br <sub>2</sub> (MA) <sub>2</sub>  | Pb <sup>2+</sup> | 598.8                      | this work |
|                                                    | Cd <sup>2+</sup> | 2175                       | this work |

Table S5 Thermodynamic parameters for the adsorption of Pb<sup>2+</sup> and Cd<sup>2+</sup> on compound **1**.

| Ion              | T (K)  | $\Delta G^0$ (kJ/mol) | $\Delta H^0$ (kJ/mol) | $\Delta S^0$ (J/mol·K) |
|------------------|--------|-----------------------|-----------------------|------------------------|
| Pb <sup>2+</sup> | 298.15 | -29.97                | 2.75                  | 109.75                 |
|                  | 308.15 | -31.07                |                       |                        |
|                  | 318.15 | -32.17                |                       |                        |
| Cd <sup>2+</sup> | 298.15 | -25.42                | -1.12                 | 81.52                  |
|                  | 308.15 | -26.23                |                       |                        |
|                  | 318.15 | -27.05                |                       |                        |
